# Supplementary material for: The Government in SNA-Compliant DSGE Models
Source: publisher site journal article supplement (doi:10.1515/bejm-2020-0120), 2021-06-23
Supplement: Supplementary file 1 [file j_bejm-2020-0120_suppl_001.pdf]

# The Government in SNA-compliant DSGE models

## Technical Appendix

(Not intended for publication)

G. F. de-Córdoba\*      B. Molinari†      J. L. Torres‡

April 2021

This Technical Appendix reports additional details on the quantitative results presented in Section 4 of the main text. Section 1 provides details on the model specification, Section 2 summarizes the system of equilibrium equations used in the simulations, Section 3 reports the calibration of the parameters and fiscal policy instruments.

## 1 Model specification

The model used for simulations is a perfect-foresight neoclassical growth model augmented with a SNA-compliant government sector as specified in the main text. In the following, we report the main modeling choices and the functional forms used.

### Households

The instantaneous households utility function is given by

$$U(\tilde{C}_t, L_t) = \gamma \log \tilde{C}_t + (1 - \gamma) \log(1 - L_t)$$

where time endowment has been normalized to one, and labor  $L_t$  is split between private labor  $L_{p,t}$ , and public labor  $L_{g,t}$ , holding  $L_t = L_{p,t} + L_{g,t}$ . Total consumption  $\tilde{C}_t$  is a composite of both private goods purchased by households,  $C_{pp,t}$ , public-produced goods,  $Y_{g,t}$ ,

---

\*Department of Economics, Universidad de Málaga and ESCP. Email: gfdc@uma.es

†Department of Economics, Universidad de Málaga and RCEA. Email: bmolinari@uma.es

‡Department of Economics, Universidad de Málaga. Email: jtorres@uma.es

and public-provided goods,  $C_{pg,t}$ . We assume that all three goods are perfectly substitute. Thus, total consumption is defined as  $\tilde{C}_t = C_{pp,t} + C_{pg,t} + C_{gg,t}$ .

Household's budget constraint is given by,

$$(1 + \tau_t^c)C_{pp,t} + C_{pg,t} + C_{gg,t} + I_{p,t} + B_{t+1} - B_t = (1 - \tau_t^l)[w_{p,t}L_{p,t} + w_{g,t}L_{g,t}] + (1 - \tau_t^k)r_tK_{p,t-1} - \delta_p\tau_t^kK_{p,t} + Z_t + (1 - \tau_t^\pi)\Pi_t$$

where  $\tau_t^c$  is the consumption tax,  $\tau_t^l$  is the labor income tax,  $\tau_t^k$  is the capital income tax,  $\tau_t^\pi$  is a profits (corporate) tax,  $I_{p,t}$  is private investment,  $K_{p,t}$  is private capital,  $w_{p,t}$  is private wage,  $w_{g,t}$  is public wage,  $r_t$  is private capital returns,  $\delta_p$  is the private capital depreciation rate,  $Z_t$  is government lump-sum transfers, and  $\Pi_t$  are profits. As usual, the accumulation process of private capital is given by  $K_{p,t+1} = (1 - \delta_p)K_{p,t} + I_{p,t}$ .

### Firms

We assume that private production is a Cobb–Douglas function with constant returns to scale. Goods are sold in a perfectly competitive market. All public capital is used by private firms. The following production function accommodates these assumptions

$$Y_{p,t} = A_{p,t}K_{p,t}^{\alpha_p}K_{g,t}^{\alpha_g}L_{p,t}^{1-\alpha_p-\alpha_g}$$

where  $A_{p,t}$  is total factor productivity in the private production sector, and  $K_{g,t}$  is public capital. Parameters  $\alpha_p$ ,  $\alpha_g$  represent the elasticity of output with respect to private capital and public capital, respectively. Public labor market is modeled following de-Córdoba et al. (2012a).

Given that firms use public capital as an input at no cost, profits are positive and equal to

$$\Pi_t = A_{p,t}K_{p,t}^{\alpha_p}K_{g,t}^{\alpha_g}L_{p,t}^{1-\alpha_p-\alpha_g} - (1 + \tau_t^s)w_{p,t}L_{p,t} - r_tK_{p,t}$$

where  $\tau_t^s$  is the social security contributions rate which it is assumed to be paid by the firms.

### Government

Total government spending  $G_t$  is defined as a fraction  $\theta$  of  $GDP_t$ , i.e.

$$\frac{G_t}{GDP_t} = \theta$$

As specified in the paper, the components of total government spending are:

$$G_t = (1 + \tau_t^s)w_{g,t}L_{g,t} + I_{g,t} + Z_t + C_{pg,t} + C_{gi,t} + r_t^B B_t$$

where  $\tau_t^s$  are social security contributions paid by firms,  $w_{g,t}$  is the public wage rate and  $L_{g,t}$  is public labor. Transfers in kind are defined  $C_{pg,t}$ , whereas social benefits and transfers other than in kind are defined  $Z_t$ . Intermediate consumption  $C_{gi,t}$  includes all production expenses bear by the government, and  $I_{g,t}$  denotes gross capital formation in the public sector (public investment). Finally, debt service is labeled  $r_t^B B_t$ , in which  $r_t^B$  is the implicit interest rate on the stock of public debt  $B_t$ . We assume that public debt is sold to international investors, thus having no effect on the interest rate of the model economy.

Fiscal revenues are given by:

$$T_t = \tau^c C_t + (\tau^l + \tau^s)(w_{p,t}L_{p,t} + w_{g,t}L_{g,t}) + \tau^k K_{p,t}(r_t - \delta_p) + \tau^\pi \Pi_t$$

Given the government budget constraint, we have

$$G_t - T_t = \Delta B_t$$

On the other hand, non-interest (primary) government expenditures,  $G_{prim,t}$ , is defined as

$$G_{prim,t} = G_t - r_t^B B_t$$

The exogenous components of total government spending are defined as

$$\begin{aligned} C_{pg,t} &= \theta_{pg} G_t \\ I_{g,t} &= \theta_{ig} G_t \\ C_{gi,t} &= \theta_{gi} G_t \\ (1 + \tau_t^{ss})w_{g,t}L_{g,t} &= \theta_{wl} G_t \\ Z_t &= \theta_{zg} G_t \end{aligned}$$

where  $\theta_{pg} + \theta_{ig} + \theta_{gi} + \theta_{wl} + \theta_{zg} = 1 - r_t^B B_t / G_t$ .

Finally, we assume that all public labor is used in public production, which according to SNA rules is defined as

$$Y_{g,t} = C_{gi,t} + (1 + \tau_t^s)w_{g,t}L_{gg,t}$$

The accumulation process of public capital is given by  $K_{g,t+1} = (1 - \delta_g)K_{g,t} + I_{g,t}$  where  $\delta_g$  is the public capital depreciation rate, and  $I_{g,t}$  is public investment.

## 2 Model equations

The collection of the model's first order conditions, market clearing and resource constraints is as follows.

$$\frac{\gamma}{C_{pp,t} + C_{pg,t} + C_{gg,t}} - \lambda_t(1 + \tau_t^c) = 0 \quad (1)$$

$$\frac{1 - \gamma}{1 - L_{p,t} - L_{g,t}} - \lambda_t(1 - \tau_t^l)w_{p,t} = 0 \quad (2)$$

$$\beta [\lambda_{t+1} (1 + (1 - \tau_{t+1}^k)(r_{t+1} - \delta_p))] - \lambda_t = 0 \quad (3)$$

$$Y_t - A_{p,t} K_{p,t}^{\alpha_p} K_{g,t}^{\alpha_g} L_{p,t}^{1-\alpha_p-\alpha_g} = 0 \quad (4)$$

$$r_t - \alpha_p A_{p,t} K_{p,t}^{\alpha_p-1} K_{g,t}^{\alpha_g} L_{p,t}^{1-\alpha_p-\alpha_g} = 0 \quad (5)$$

$$(1 + \tau_t^s)w_{p,t} - (1 - \alpha_p - \alpha_g)A_t K_{p,t}^{\alpha_p} K_{g,t}^{\alpha_g} L_{p,t}^{-\alpha_p - \alpha_g} = 0 \quad (6)$$

$$\Pi_t - A_{p,t} K_{p,t}^{\alpha_p} K_{g,t}^{\alpha_g} L_{p,t}^{1 - \alpha_p - \alpha_g} - (1 + \tau_t^s)w_{p,t} L_{p,t} - r_t K_{p,t} = 0 \quad (7)$$

$$K_{p,t+1} - (1 - \delta_p)K_{p,t} - I_{p,t} = 0 \quad (8)$$

$$K_{g,t+1} - (1 - \delta_g)K_{g,t} - I_{g,t} = 0 \quad (9)$$

$$G_t - (1 + \tau_t^s)w_{g,t} L_{g,t} - I_{g,t} - Z_t - C_{pg,t} - C_{gi,t} - r_t^B B_t = 0 \quad (10)$$

$$w_{g,t} = w_{p,t} \quad (11)$$

$$G_t = \theta GDP_t \quad (12)$$

$$C_{pg,t} - \theta_{pg} G_t = 0 \quad (13)$$

$$I_{g,t} - \theta_{ig} G_t = 0 \quad (14)$$

$$C_{gi,t} - \theta_{gi} G_t = 0 \quad (15)$$

$$(1 + \tau_t^s)w_{g,t} L_{g,t} - \theta_{wl} G_t = 0 \quad (16)$$

$$Z_t - \theta_{zg} G_t = 0 \quad (17)$$

$$T_t - \left( \begin{array}{c} \tau_t^c C_{p,t} + \tau_t^l (w_{p,t} L_{p,t} + w_{g,t} L_{g,t}) + \tau_t^k (r_t - \delta_{K_p}) K_{p,t-1} \\ + \tau_t^s (w_{p,t} L_{p,t} + w_{g,t} L_{g,t}) + \tau_t^\pi \Pi_t \end{array} \right) = 0 \quad (18)$$

$$G_t + (1 + r_t^B) B_t - (T_t + B_{t+1}) = 0 \quad (19)$$

$$L_t - L_{p,t} - L_{g,t} = 0 \quad (20)$$

$$\begin{aligned} (1 + \tau_t^c) C_{pp,t} + C_{pg,t} + C_{gg,t} + I_{p,t} + B_{t+1} - B_t - (1 - \tau_t^l) [w_{p,t} L_{p,t} + w_{g,t} L_{g,t}] \\ - (1 - \tau_t^k) r_t K_{p,t-1} + \delta_p \tau_t^k K_{p,t} - Z_t - (1 - \tau_t^\pi) \Pi_t = 0 \end{aligned} \quad (21)$$

$$Y_{g,t} = C_{gi,t} + (1 + \tau_t^s) w_{g,t} L_{gg,t} \quad (22)$$

$$GDP_t = C_{pp,t} + C_{pg,t} + I_{p,t} + I_{g,t} + Y_{g,t} \quad (23)$$

The set of equations is completed with the usual transversality condition  $\lim_{t \rightarrow \infty} \beta^t \lambda_t K_t = 0$ .

### 3 Calibration

Table 1 presents the calibration of deep parameters and Table 2 presents the calibration of the fiscal policy parameters. For the calibration of government spending, we use data for France as described in Section 3.2 of the main text (details on data sources in Section 2.2). For the calibration of fiscal income, we use data for France as described in Section 2.3 of the main text.

Table 1: Calibration: Deep parameters

| Description                              | Parameter   | Value | Target                            |
|------------------------------------------|-------------|-------|-----------------------------------|
| <i>Discount factor</i>                   | $\beta$     | 0.96  | Subjective discount rate 4.1%     |
| <i>Preference parm</i>                   | $\gamma$    | 0.45  | Labor fraction 33% of time endow. |
| <i>Private capital depreciation rate</i> | $\delta_p$  | 0.07  | Annual depreciation 7%            |
| <i>Public capital depreciation rate</i>  | $\delta_g$  | 0.04  | Annual depreciation 4%            |
| <i>Cobb–Douglas technology parm</i>      | $\alpha_p$  | 0.27  | Labor share of income 65%         |
| <i>Cobb–Douglas technology parm</i>      | $\alpha_g$  | 0.08  | Public/private capital ratio      |
| <i>Public/private wage premium</i>       | $w_g/w_p$   | 1.00  | OECD wages data*                  |
| <i>Private aggregate productivity</i>    | $\bar{A}_p$ | 1.00  | Normalization                     |

The wage premium is calibrated using the estimations for France as reported in De-Córdoba et al. (2012b).

Table 2: Calibration: Policy Vector

| Description                         | Parameter     | Value  | Target                                    |
|-------------------------------------|---------------|--------|-------------------------------------------|
| <i>Total Government spending</i>    | $G_t$         | 56.60% | TLYCG (% GDP)                             |
| <i>Primary spending</i>             | $G_{prim,t}$  | 54.71% | TLYCG - D4 (% GDP)                        |
| <i>Intermediate consumption</i>     | $\theta_{gi}$ | 0.0887 | P2 (% G)                                  |
| <i>Transfers in kind</i>            | $\theta_{pg}$ | 0.1062 | D63 (% G)                                 |
| <i>Gross capital formation</i>      | $\theta_{ig}$ | 0.0615 | P5+K2+D9 (% G)                            |
| <i>Compensation to employees</i>    | $\theta_{wl}$ | 0.2208 | D1 (% G)                                  |
| <i>Transfers other than in kind</i> | $\theta_{zg}$ | 0.4844 | D62 + D3+ D7 (% G)                        |
| <i>Capital income tax</i>           | $\tau^k$      | 0.1179 | Capital income tax (effective)            |
| <i>Labor income tax</i>             | $\tau^l$      | 0.3620 | Personal income tax (effective)           |
| <i>Social Security tax</i>          | $\tau^s$      | 0.3581 | Social Security contributions (effective) |
| <i>Consumption tax</i>              | $\tau^c$      | 0.2000 | Taxes on consumption (effective)          |
| <i>Profits tax</i>                  | $\tau^\pi$    | 0.2800 | Corporate tax (statutory)                 |

Spending codes from OECD database >> *Annual National Accounts* >> *General Government Accounts* >> 11. *Government expenditures by function (COFOG)*.

Effective tax rates from OECD database >> *Tax* >> *Tax policy analysis* >> *OECD Tax Database*

## References

- [1] De-Córdoba, G., Pérez, J. and J. L. Torres (2012a): “Public and private sector wages interactions in a general equilibrium model”, *Public Choice*, 150(1), 309-326.
- [2] De-Córdoba, G. Pérez, J. J. and J. L. Torres (2012b): “On the substitutability between public and private employment”, *Economics Bulletin*, 32(3), 2700-2709.
